# Supplementary material for: Carboplatin- and Etoposide-Loaded Lactoferrin Protein Nanoparticles for Targeting Cancer Stem Cells in Retinoblastoma In Vitro
Source: PubMed Central journal article supplement — Invest Ophthalmol Vis Sci. 2021 Nov 16;62(14):13. doi: 10.1167/iovs.62.14.13 (PMC8606840; doi:10.1167/iovs.62.14.13), 2021-11-16
Supplement: iovs-62-14-13_s001.pdf [file iovs-62-14-13_s001.pdf]

Supplementary information 1: CPT estimation plot

| CPT Concentration (µg/ml) | Area under curve |
|---------------------------|------------------|
| 20                        | 418832           |
| 40                        | 831651           |
| 60                        | 1218480          |
| 80                        | 1590622          |
| 100                       | 2083623          |

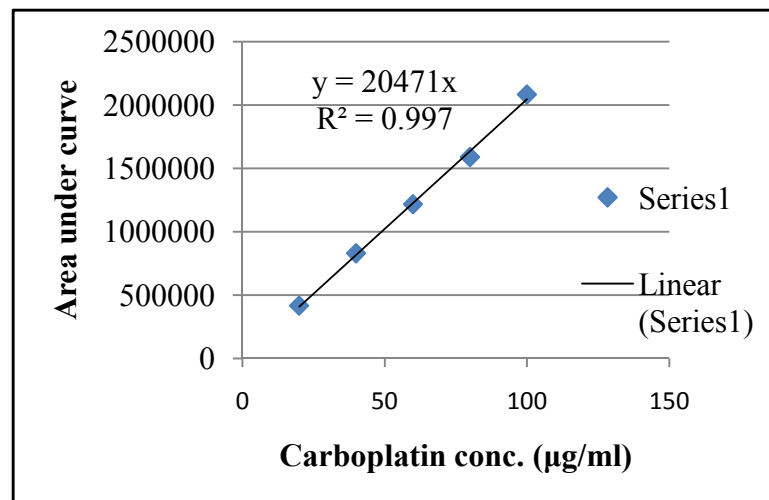

Supplementary information 2: CPT encapsulation and loading efficiency

| CPT Concentration (µg/ml) | Lf-Nps concentration (µg/ml) | Area under curve | Encapsulated drug conc. (µg/ml) | Encapsulation efficiency (%) | Loading capacity (%) |
|---------------------------|------------------------------|------------------|---------------------------------|------------------------------|----------------------|
| 50                        | 250                          | 587081           | 28.689                          | 57.37931                     | 11.47586             |
| 50                        | 250                          | 502398           | 24.556                          | 49.11367                     | 9.822734             |
| 100                       | 500                          | 1331801          | 65.034                          | 65.03453                     | 13.00691             |
| 100                       | 500                          | 1475429          | 72.044                          | 72.04407                     | 14.40881             |
| 150                       | 750                          | 1823865          | 89.048                          | 59.36595                     | 11.87319             |
| 150                       | 750                          | 1685743          | 82.308                          | 54.87207                     | 10.97441             |

Supplementary information 3: ETP estimation plot

| ETP concentration (µg/ml) | Area under curve |
|---------------------------|------------------|
| 10                        | 26914            |
| 20                        | 80874            |
| 30                        | 124118           |
| 40                        | 203676           |
| 50                        | 272364           |

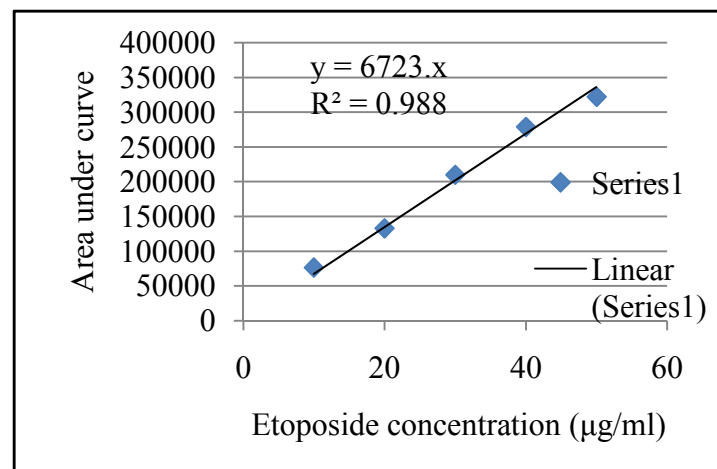

Supplementary information 4: ETP encapsulation and loading efficiency

| ETP concentration (µg/ml) | Lf-Nps concentration (µg/ml) | Area under curve | Encapsulated drug conc. (µg/ml) | Encapsulation Efficiency (%) | Loading capacity (%) |
|---------------------------|------------------------------|------------------|---------------------------------|------------------------------|----------------------|
| 50                        | 250                          | 90400            | 21.754                          | 43.508                       | 8.701                |
| 50                        | 250                          | 91217            | 21.885                          | 43.771                       | 8.754                |
| 100                       | 500                          | 182430           | 36.578                          | 36.578                       | 7.315                |
| 100                       | 500                          | 1919595          | 38.113                          | 38.113                       | 7.622                |
| 150                       | 750                          | 271036           | 50.851                          | 33.901                       | 6.780                |
| 150                       | 750                          | 257678           | 48.701                          | 32.467                       | 6.493                |
